# Supplementary material
Source: PubMed Central journal article supplement (PMC10147587)
Supplement: NIHMS1884913-supplement-321692_Major_Resources_Table.pdf [file NIHMS1884913-supplement-321692_Major_Resources_Table.pdf]

## Major Resources Table

In order to allow validation and replication of experiments, all essential research materials listed in the Methods should be included in the Major Resources Table below. Authors are encouraged to use public repositories for protocols, data, code, and other materials and provide persistent identifiers and/or links to repositories when available. Authors may add or delete rows as needed.

### Animals (in vivo studies)

| Species | Vendor or Source | Background Strain | Sex | Persistent ID / URL |
|---------|------------------|-------------------|-----|---------------------|
|         |                  |                   |     |                     |
|         |                  |                   |     |                     |
|         |                  |                   |     |                     |

### Genetically Modified Animals

|                 | Species | Vendor or Source | Background Strain | Other Information | Persistent ID / URL |
|-----------------|---------|------------------|-------------------|-------------------|---------------------|
| Parent - Male   |         |                  |                   |                   |                     |
| Parent - Female |         |                  |                   |                   |                     |

### Antibodies

| Target antigen | Vendor or Source         | Catalog #       | Working concentration | Persistent ID / URL                                                                                                                                                                                                                                                                                                                                                         |
|----------------|--------------------------|-----------------|-----------------------|-----------------------------------------------------------------------------------------------------------------------------------------------------------------------------------------------------------------------------------------------------------------------------------------------------------------------------------------------------------------------------|
| Mouse IgG      | Abcam                    | ab46540         | 1:50                  | <a href="https://www.abcam.com/rabbit-mouse-igg-hl-ab46540.html">https://www.abcam.com/rabbit-mouse-igg-hl-ab46540.html</a>                                                                                                                                                                                                                                                 |
| H3K4me3        | Active Motifs            | 391159          | 1:50                  | <a href="https://www.activemotif.com/catalog/details/39159/histone-h3-trimethyl-lys4-antibody-pab">https://www.activemotif.com/catalog/details/39159/histone-h3-trimethyl-lys4-antibody-pab</a>                                                                                                                                                                             |
| CREB           | EMD Millipore            | CS203204        | 1:50                  | <a href="https://www.emdmillipore.com/CA/en/product/ChIPAb-CREB-ChIP-Validated-Antibody-and-Primer-Set-rabbit-monoclonal,MM_NF-17-600">https://www.emdmillipore.com/CA/en/product/ChIPAb-CREB-ChIP-Validated-Antibody-and-Primer-Set-rabbit-monoclonal,MM_NF-17-600</a>                                                                                                     |
| H3K27ac        | Abcam                    | ab4729          | 1:50                  | <a href="http://abcam.com/histone-h3-acetyl-k27-antibody-chip-grade-ab4729.html">abcam.com/histone-h3-acetyl-k27-antibody-chip-grade-ab4729.html</a>                                                                                                                                                                                                                        |
| Rabbit IgG     | Novus                    | NBP1-72763      | 1:100                 | <a href="https://www.novusbio.com/products/igg-h-l-antibody_nbp1-72763">https://www.novusbio.com/products/igg-h-l-antibody_nbp1-72763</a>                                                                                                                                                                                                                                   |
| FHL5           | Novus                    | NBP1-32660      | 1:100; 1:50           | <a href="https://www.novusbio.com/products/fhl5-antibody_nbp1-32660">https://www.novusbio.com/products/fhl5-antibody_nbp1-32660</a>                                                                                                                                                                                                                                         |
| FHL5           | Abnova                   | H00009457-M01   | 1:1000                | <a href="https://www.abnova.com/products/products_detail.asp?catalog_id=H00009457-M01">https://www.abnova.com/products/products_detail.asp?catalog_id=H00009457-M01</a>                                                                                                                                                                                                     |
| H3             | Cell Signaling           | 9715S           | 1:5000                | <a href="https://www.cellsignal.com/products/primary-antibodies/histone-h3-antibody/9715?site-search-type=Products&amp;N=4294956287&amp;Ntt=9715s&amp;fromPage=plp&amp;requestid=806222">https://www.cellsignal.com/products/primary-antibodies/histone-h3-antibody/9715?site-search-type=Products&amp;N=4294956287&amp;Ntt=9715s&amp;fromPage=plp&amp;requestid=806222</a> |
| ACTA2          | Abcam                    | ab5694          | 1:2500                | <a href="https://www.abcam.com/alpha-smooth-muscle-actin-antibody-ab5694.html">https://www.abcam.com/alpha-smooth-muscle-actin-antibody-ab5694.html</a>                                                                                                                                                                                                                     |
| TAGLN          | Abcam                    | ab14106         | 1:2500                | <a href="https://www.abcam.com/taglntransgelin-antibody-ab14106.html">https://www.abcam.com/taglntransgelin-antibody-ab14106.html</a>                                                                                                                                                                                                                                       |
| HA             | Abcam                    | ab9110          | 1:5000                | <a href="https://www.abcam.com/ha-tag-antibody-chip-grade-ab9110.html">https://www.abcam.com/ha-tag-antibody-chip-grade-ab9110.html</a>                                                                                                                                                                                                                                     |
| RUNX2          | Santa Cruz Biotechnology | sc-390351       | 1:300                 | <a href="https://www.scbt.com/p/runx2-antibody-f-2">https://www.scbt.com/p/runx2-antibody-f-2</a>                                                                                                                                                                                                                                                                           |
| F-Actin        | ThermoFisher             | ActinGreen™ 488 | 1:400                 | <a href="https://www.thermofisher.com/order/catalog/product/R37110">https://www.thermofisher.com/order/catalog/product/R37110</a>                                                                                                                                                                                                                                           |

DOI [to be added]

|         |                          |             |        |                                                                                                                                                                                                                                                                                                                               |
|---------|--------------------------|-------------|--------|-------------------------------------------------------------------------------------------------------------------------------------------------------------------------------------------------------------------------------------------------------------------------------------------------------------------------------|
|         | Scientific               | ReadyProbes |        |                                                                                                                                                                                                                                                                                                                               |
| a-SMA   | Santa Cruz Biotechnology | SC-53142    | 1:100  | <a href="https://www.scbt.com/p/smooth-muscle-actin-antibody-b4?gclid=CjwKCAiA0cyfBhBREiwAAtStHLfLTloyo6jBmptBp4F2rtv7g-yI7RQxu28NJKBgYINq-IG5UH6zxoCwEkQAvD_BwE">https://www.scbt.com/p/smooth-muscle-actin-antibody-b4?gclid=CjwKCAiA0cyfBhBREiwAAtStHLfLTloyo6jBmptBp4F2rtv7g-yI7RQxu28NJKBgYINq-IG5UH6zxoCwEkQAvD_BwE</a> |
| Tubulin | Invitrogen               | 32-2500     | 1:1000 | <a href="https://www.thermofisher.com/antibody/product/alpha-Tubulin-Antibody-clone-B-5-1-2-Monoclonal/32-2500">https://www.thermofisher.com/antibody/product/alpha-Tubulin-Antibody-clone-B-5-1-2-Monoclonal/32-2500</a>                                                                                                     |
| MYLK    | Abcam                    | ab76092     | 1:2000 | <a href="https://www.abcam.com/myosin-light-chain-kinasemlck-antibody-ep1458y-ab76092.html">https://www.abcam.com/myosin-light-chain-kinasemlck-antibody-ep1458y-ab76092.html</a>                                                                                                                                             |
| pMLC20  | Cell Signaling           | 3671        | 1:1000 | <a href="https://www.cellsignal.com/products/primary-antibodies/phospho-myosin-light-chain-2-ser19-antibody/3671">https://www.cellsignal.com/products/primary-antibodies/phospho-myosin-light-chain-2-ser19-antibody/3671</a>                                                                                                 |

#### DNA/cDNA Clones

| Clone Name | Sequence | Source / Repository | Persistent ID / URL                                                                                                                                                                                                                         |
|------------|----------|---------------------|---------------------------------------------------------------------------------------------------------------------------------------------------------------------------------------------------------------------------------------------|
| FHL5       | 5035.1   | NCBI CCDS Database  | <a href="https://www.ncbi.nlm.nih.gov/projects/CCDS/CcidsBrowse.cgi?REQUEST=GV&amp;DATA=647651&amp;BUILDS=CURRENTBUILDS">https://www.ncbi.nlm.nih.gov/projects/CCDS/CcidsBrowse.cgi?REQUEST=GV&amp;DATA=647651&amp;BUILDS=CURRENTBUILDS</a> |

#### Cultured Cells

| Name    | Vendor or Source  | Sex (F, M, or unknown) | Persistent ID / URL |
|---------|-------------------|------------------------|---------------------|
| HCASMC  | Cell Applications | F                      |                     |
| HEK293T | ATCC              | Unknown                |                     |
| A7r5    | ATCC              | Unknown                |                     |

#### Data & Code Availability

| Description                                              | Source / Repository                     | Persistent ID / URL                                                                                                                     |
|----------------------------------------------------------|-----------------------------------------|-----------------------------------------------------------------------------------------------------------------------------------------|
| Human Coronary Artery scATAC-seq                         | GSE175621                               | <a href="https://www.ncbi.nlm.nih.gov/geo/query/acc.cgi?acc=GSE175621">https://www.ncbi.nlm.nih.gov/geo/query/acc.cgi?acc=GSE175621</a> |
| Bulk Coronary Artery RNA-seq                             | GSE72696                                | <a href="https://www.ncbi.nlm.nih.gov/geo/query/acc.cgi?acc=GSE72696">https://www.ncbi.nlm.nih.gov/geo/query/acc.cgi?acc=GSE72696</a>   |
| Bulk RNA-seq (Left Ventricle, Liver, HUVEC, HEPG2, K562) | ENCODE                                  | <a href="https://www.encodeproject.org">https://www.encodeproject.org</a>                                                               |
| Bulk RNA-seq (Human Coronary Artery Smooth Muscle Cells) | GSE141752                               | <a href="https://www.ncbi.nlm.nih.gov/geo/query/acc.cgi?acc=GSE141752">https://www.ncbi.nlm.nih.gov/geo/query/acc.cgi?acc=GSE141752</a> |
| Human Coronary Artery scRNA-seq                          | GSE131780                               | <a href="https://www.plaquiview.com">https://www.plaquiview.com</a>                                                                     |
| GTEEx AOR eQTL                                           | GTEEx                                   | <a href="https://gtexportal.org/home/datasets">https://gtexportal.org/home/datasets</a>                                                 |
| STARNET AOR eQTL and Gene Regulatory Network             | STARNET                                 | <a href="http://starnet.mssm.edu">http://starnet.mssm.edu</a>                                                                           |
| GWAS summary statistics and gene annotations             | Cardiovascular Disease Knowledge Portal | <a href="https://cvd.hugeamp.org">https://cvd.hugeamp.org</a>                                                                           |

#### Other

| Description | Source / Repository | Persistent ID / URL |
|-------------|---------------------|---------------------|
|             |                     |                     |

DOI [to be added]

|  |  |  |
|--|--|--|
|  |  |  |
|  |  |  |

**ARRIVE GUIDELINES**

The ARRIVE guidelines (<https://arriveguidelines.org/>) are a checklist of recommendations to improve the reporting of research involving animals. Key elements of the study design should be included below to better enable readers to scrutinize the research adequately, evaluate its methodological rigor, and reproduce the methods or findings.

**Study Design**

| Groups             | Sex | Age | Number (prior to experiment) | Number (after termination) | Littermates (Yes/No) | Other description |
|--------------------|-----|-----|------------------------------|----------------------------|----------------------|-------------------|
| Group 1 (Control)  |     |     |                              |                            |                      |                   |
| Group 2            |     |     |                              |                            |                      |                   |
| Add more if needed |     |     |                              |                            |                      |                   |

**Sample Size:** Please explain how the sample size was decided Please provide details of any a *prior* sample size calculation, if done.

**Inclusion Criteria**

**Exclusion Criteria**

**Randomization**

**Blinding**
