# Supplementary material
Source: PubMed Central journal article supplement (PMC10147587)

Full unedited gel #1 for Figure 3a

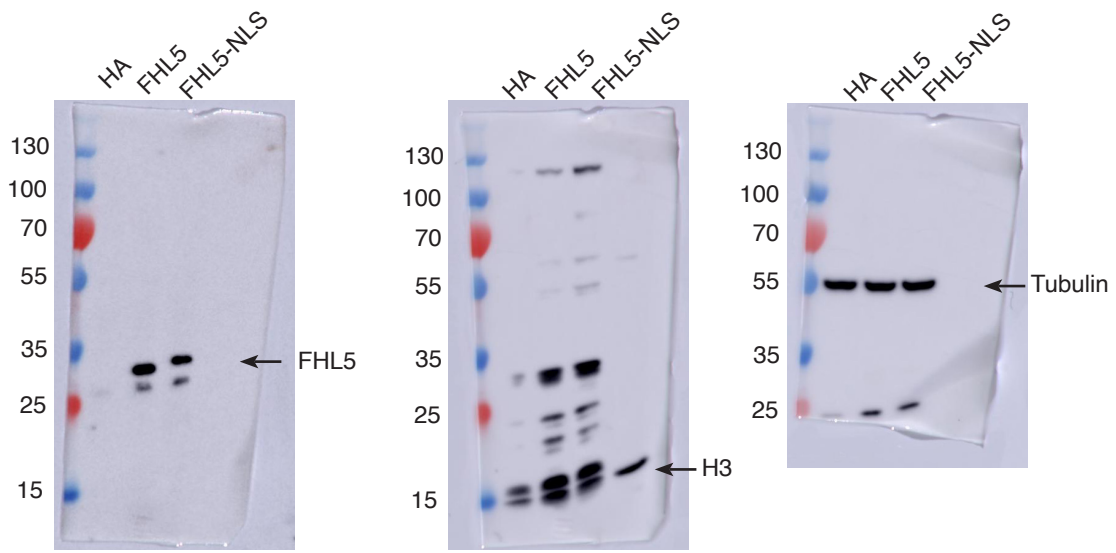

Full unedited gel #1 for Figure S7a

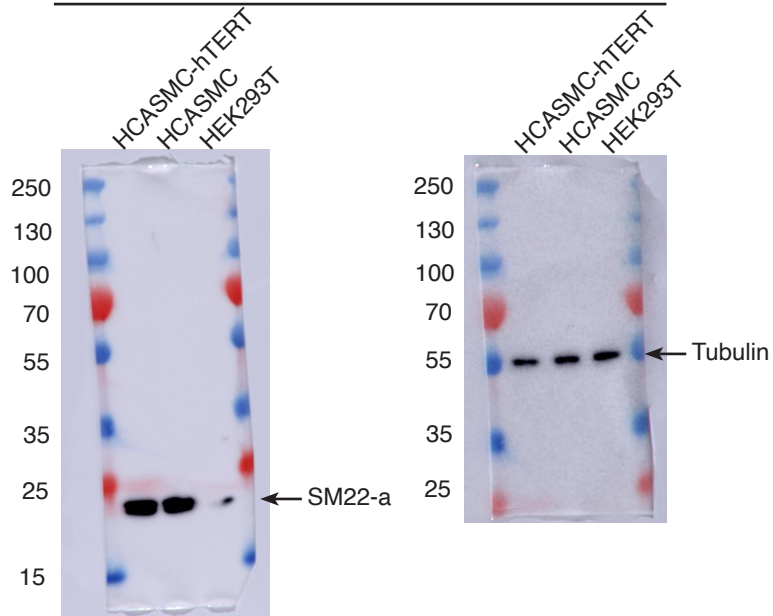

Full unedited gel #1 for Figure S8b

No stimulation      10uM PE

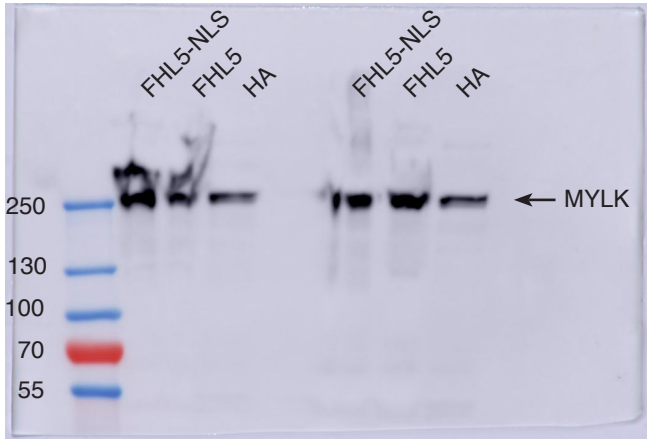

Full unedited gel #1 for Figure S8b (cut)

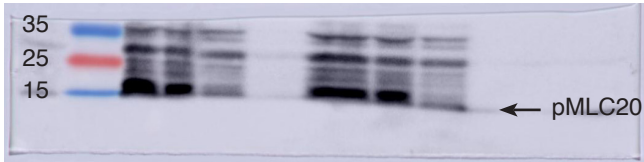

Full unedited gel #2 for Figure S8b

No stimulation      10uM PE

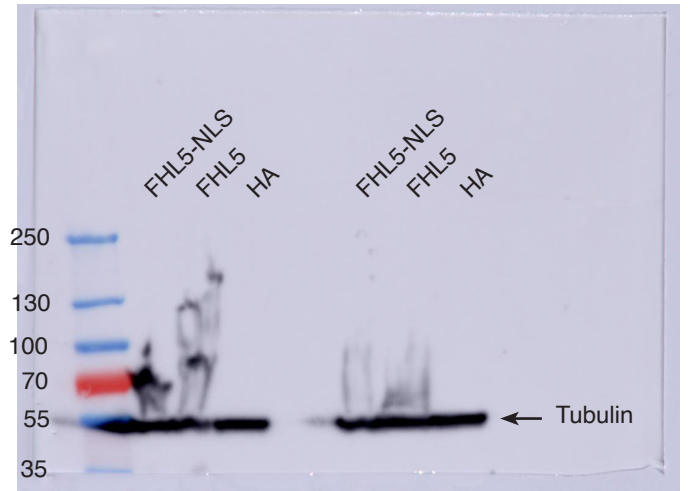

Full unedited gel #2 for Figure S8b (cut)

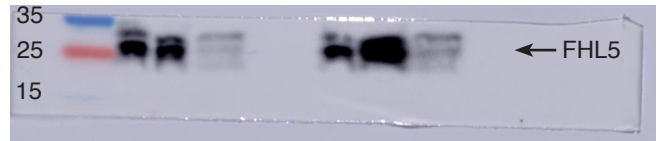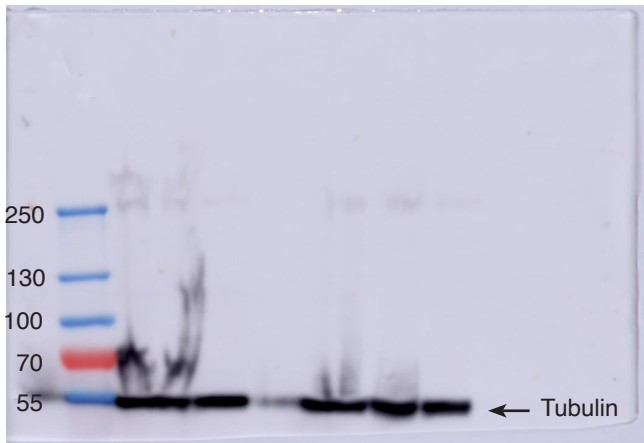

Full unedited gel #1 for Figure S9i

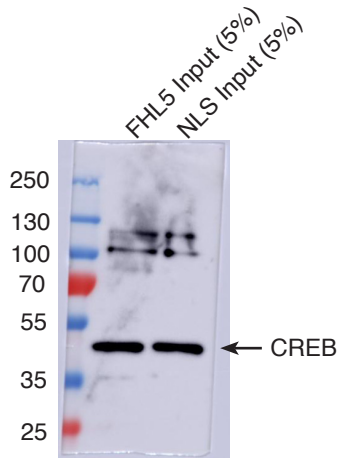

Full unedited gel #2 for Figure S9i

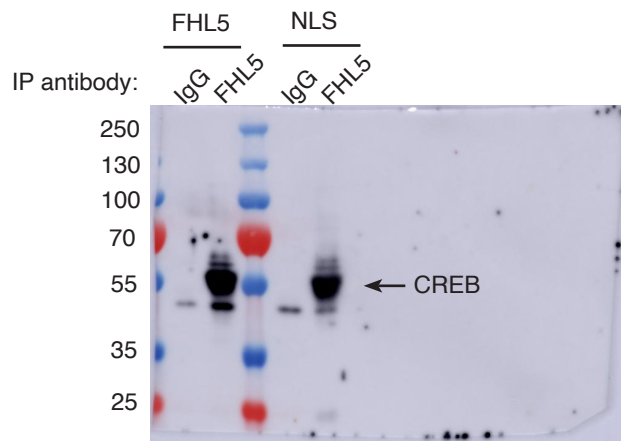

Full unedited gel #1 for Figure S9i (cut)

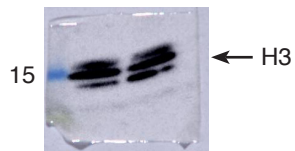

Full unedited gel #2 for Figure S9i (cut)

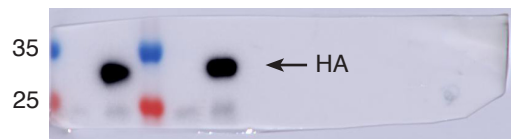

Supplement: NIHMS1884913-supplement-321692_Uncut_Gel_Blots.pdf [file NIHMS1884913-supplement-321692_Uncut_Gel_Blots.pdf]
